# Supplementary material
Source: publisher figshare collection journal article supplement (https://karger.figshare.com/ndownloader/files/12500345)
Supplement: Supplementary file 1 [file 12500345]

**Table 1 qRT-PCR primer sequences**

| Name                | Forward primer (5'-3')      | Reverse primer (5'-3')        |
|---------------------|-----------------------------|-------------------------------|
| RUNx                | ACCACGAGCCACTTCAGCAG        | CGATGGTGTGGCGCTGTA            |
| HLTF                | GTCCTCTTGTTCATCCCACTCA      | CGTCTTTGCTTAGTCCATCTGCCTT     |
| CDKN2A              | CATAGATGCCGCGGAAGGT         | ATCTAAGTTTCCCGAGGTTTCTCA      |
| HPP1                | TGCTTTCCCTACCTCCTTAAGTGA    | CTGTCATCATAACCAGAGCAATTCC     |
| PTEN                | CAAGATGATGTTTGAACTATTCCAATG | CCTTTAGCTGGCAGACCACAA         |
| APC                 | GGA AGC AGA GAA AGT ACT GGA | CTG AAG TTG AGC GTA ATA CCA G |
| MLH                 | GAGTGGCTGGACAGAGGAAG        | TTTCTTCGTCCCAATTCACC          |
| RASSF1A             | GGCGTCGTGCGCAAAGGCC         | GGGTGGCTTCTTGCTGGAGGG         |
| MST1                | GATGGGCACTGTCCGAGTAG        | GCAACGTGTCATCGTGCTC           |
| LATS                | TAGAGCAGAGGGCGCGGAAG        | CCAACACTCCACCAGTCACAGA        |
| VEGF <sub>165</sub> | ATCTTCAAGCCATCCTGTGTGC      | CAAGGCCACAGGGATTTTC           |
| VEGF <sub>189</sub> | ATCTTCAAGCCATCCTGTGTGC      | CACAGGGAACGCTCCAGGAC          |
| TSP2                | TCGTGCGCTTTGACTACATC        | GTGCCGTCAATCCAGAGGT           |
| TSP1                | TTGTCTTTGGAACCACACCA        | CTGGACAGCTCATCACAGGA          |
| Foxo-3a             | ACAATAGCAACAAGTATACCAAGAGC  | GACTGTCGTCAGCTGATTCCG         |
| FOXO1               | GGAGGAAATGCCACACTTAGCG      | TAGGACTTCTTGGGTCTTGGGGTG      |
| PTTG1               | TGATCCTTGACGAGGAGAGAG       | GGTGGCAATTCAACATCCAGG         |
| GAPDH               | CGACCACTTTGTCAAGCTCA        | AGGGGAGATTCAGTGTGGTG          |

Figure S1.

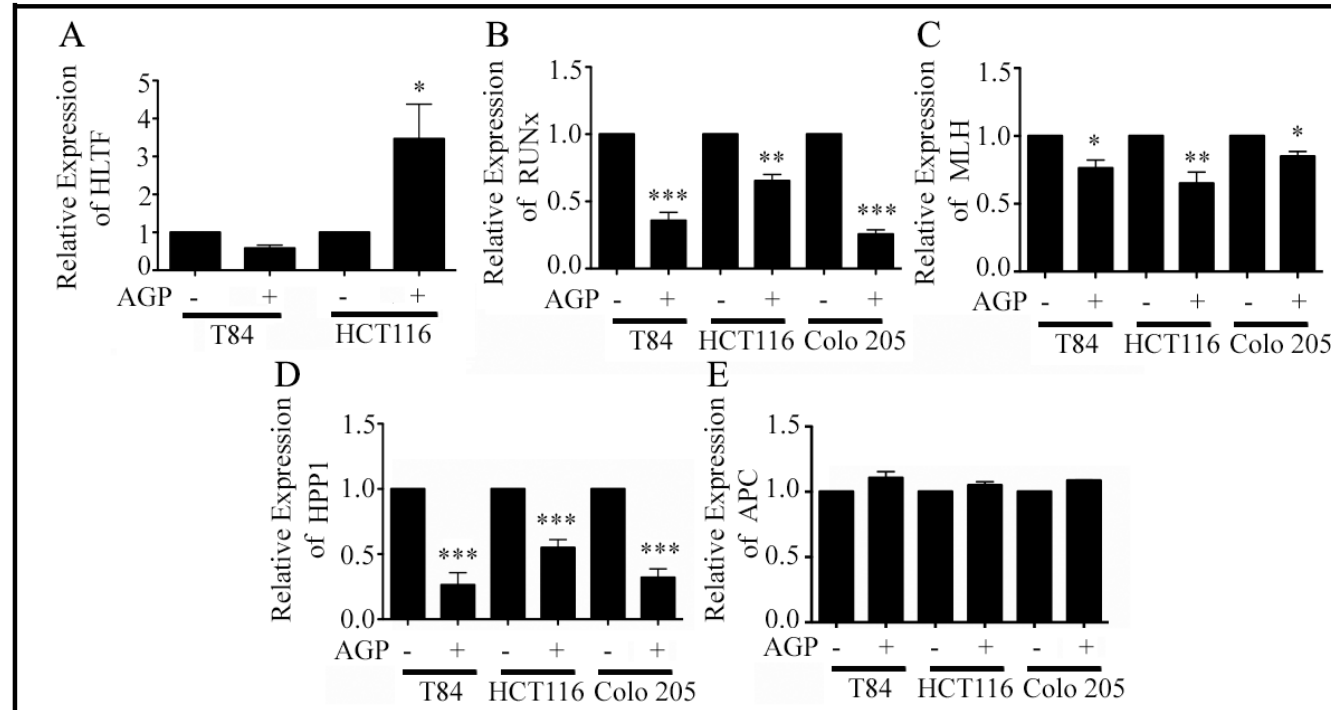

Figure S2.

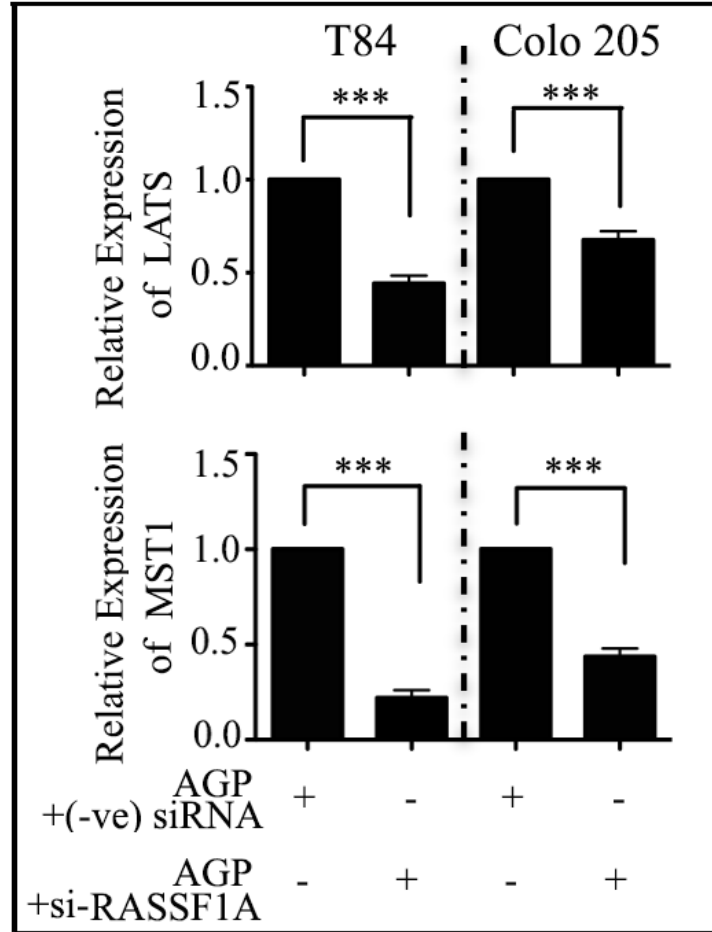

Figure S3.

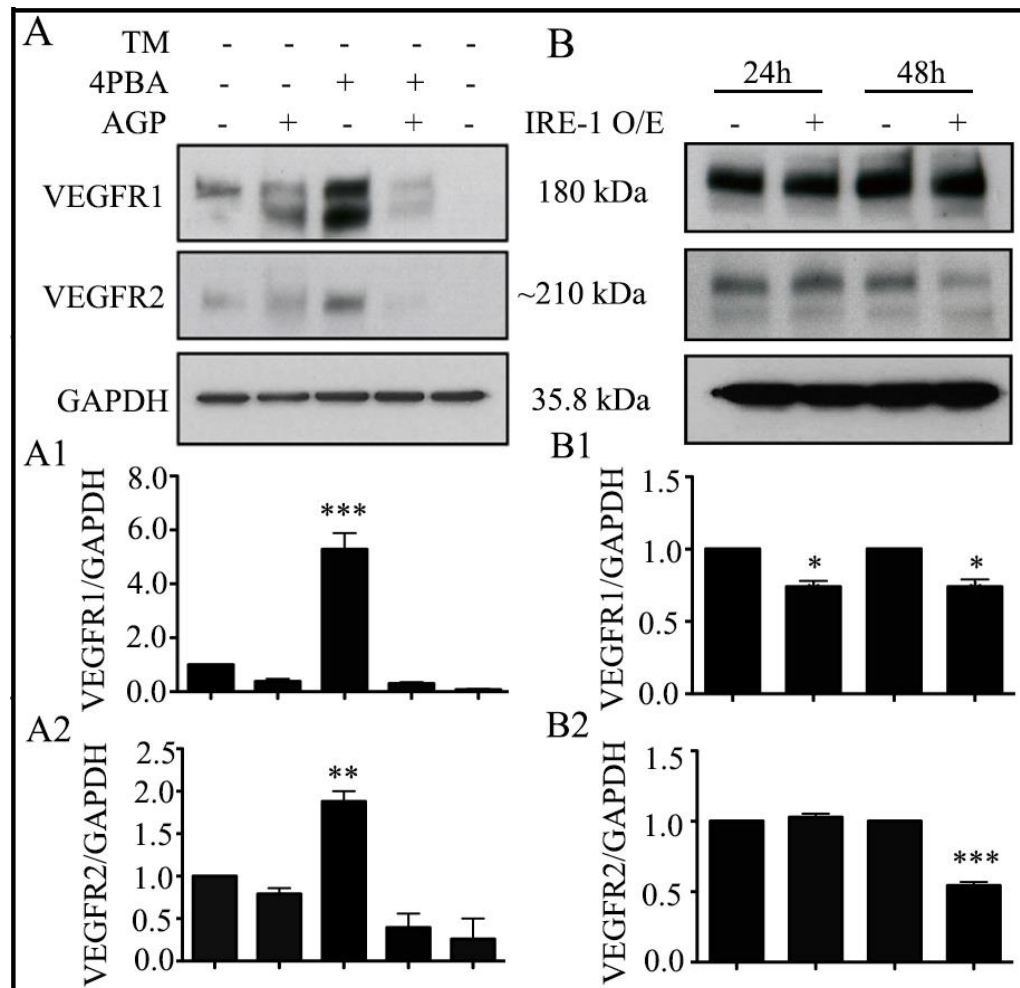

Figure S4.

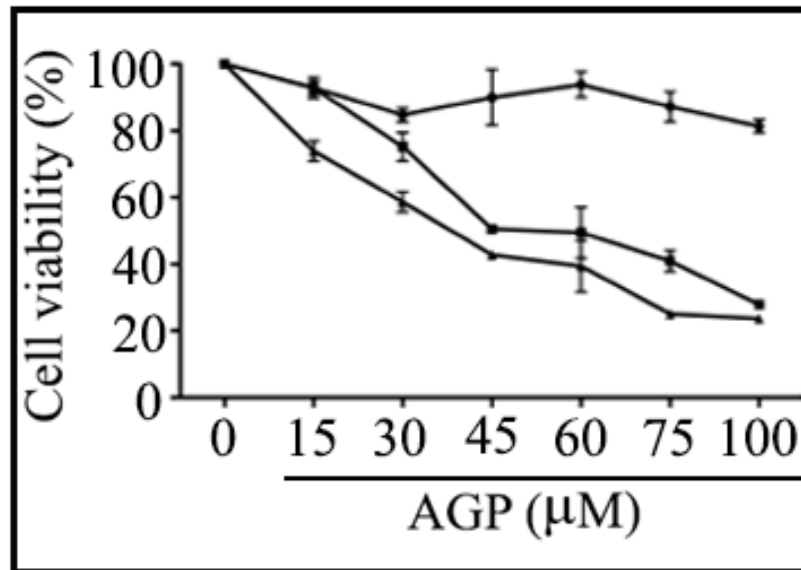

Figure S5.

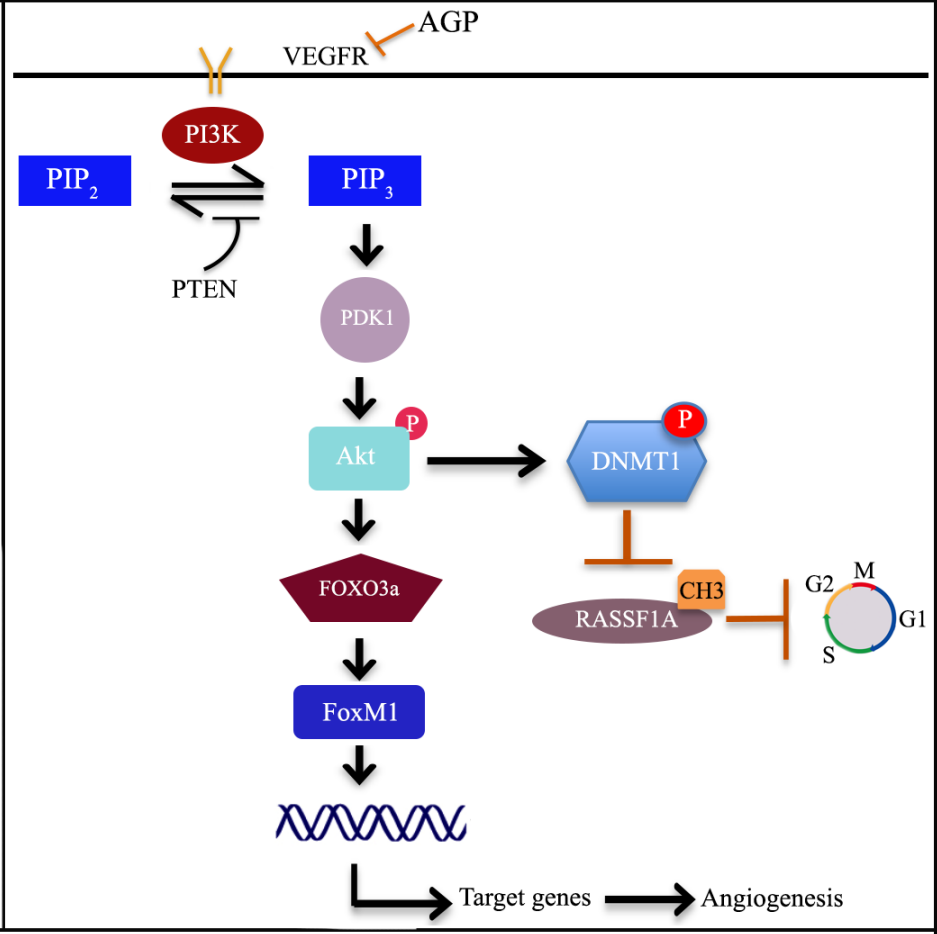

**Supplementary Figure 1.** Andrographolide induced tumor suppressor gene expression. Colon cancer cells were treated with AGP IC<sub>50</sub> for 48h and relative gene expression for (A) HLTF, (B) RUNx, (C) MLH, (D) HPP1 and (E) APC was determined by qRT-PCR.

**Supplementary Figure 2.** Andrographolide induced RASSF1A influences hippo pathway signaling. T84 and Colo 205 cells were transfected with RASSF1A siRNA and then treated with AGP for 48h. Cells were evaluated for mRNA expression by qRT-PCR for LATS (*upper histogram*) and for MST1 (*lower histogram*) (\*\*P<0.001).

**Supplementary Figure 3.** ER stress regulates VEGFR expression in andrographolide treated cells. **A.** T84 were treated with AGP in the presence or absence of the ER stress chemical inhibitor 4PBA for 48h and cell lysates were evaluated for protein expression of VEGFR1 and VEGFR2 by western blot. Histogram representing quantification of VEGFR1 and VEGFR2 by scanning densitometry are presented. **B.** T84 cells were transfected with plasmid for overexpression of IRE-1 and then treated with AGP. Cell lysates were analyzed by western blot for VEGFR1 and VEGFR2 and quantified by densitometry. Expression is normalized against GAPDH expression. (\*P<0.05, \*\*P<0.01, \*\*\*P<0.001).

**Supplementary Figure 4.** Andrographolide suppresses cell proliferation in endothelial cells. Endothelial cells were treated with AGP for 24, 48, and 72 h and cell viability was quantified by MTT assay.

**Supplementary Figure 5.** Schematic representation for RASSF1A regulation in cells treated with andrographolide. AGP treatment results in reduced levels of angiogenesis signaling events including phospho-Akt. Lower levels of activated Akt results in less stable DNMT which then results in reduced methylation of the RASSF1A gene allowing for increased RASSF1A expression. AGP also significantly increases PTEN expression which blocks the conversion of PIP<sub>2</sub> to PIP<sub>3</sub> and consequently results in reduced activation of Akt downstream.
